# Supplementary material for: De novo identification of essential protein domains from CRISPR-Cas9 tiling-sgRNA knockout screens
Source: PubMed Central journal article supplement (PMC6778102; doi:10.1038/s41467-019-12489-8), 2019-10-04
Supplement: 41467_2019_12489_MOESM7_ESM.pdf [file 41467_2019_12489_MOESM7_ESM.pdf]

**Title: Supplementary Data 1:**

**Description:** Annotations of 15 essential protein domains targeted by small molecular drugs approved by FDA or in clinical trials.

**Title: Supplementary Data 2:**

**Description:** Averaged Z-scores of 159 genes in three different cell lines in the Munoz dataset, essentiality is assessed with threshold of -0.4.

**Title: Supplementary Data 3:**

**Description:** Annotation of 175 CKHS regions in 83 proteins called by ProTiler.

**Title: Supplementary Data 4:**

**Description:** Annotations of Pfam domains and their CKHS states for 51 multi-domain proteins in the Munoz dataset.

**Title: Supplementary Data 5:**

**Description:** Proteome-wide prediction of CKHS regions.
